# Supplementary material
Source: PubMed Central journal article supplement (PMC5892395)
Supplement: esx066_suppl_supplement_table1.pdf [file esx066_suppl_supplement_table1.pdf]

## Multiplexing Strategy

Legend:

6-FAM

NED

VIC

| Mix1  | Est. Sizes (bp) |
|-------|-----------------|
| VVY15 | 171-188         |
| VVY16 | 213-243         |
| VVY3  | 413-433         |

| Mix2    | Est. Sizes |
|---------|------------|
| VVY8    | 118-121    |
| Y29-Fox | 189-195    |
| VVY17   | 241-255    |
| Y30-Fox | 399-415    |

| Mix3  | Est. Sizes |
|-------|------------|
| VVY14 | 150-154    |
| VVY5  | 218-232    |
| VVY11 | 300-316    |

| Mix4  | Est. Sizes |
|-------|------------|
| VVY7  | 258-282    |
| VVY10 | 326-332    |
| VVY13 | 418-426    |

**Supplementary Table 1: Multiplexing strategy.** Marker names are listed in 4 “mixes” corresponding to the four plates used for fragment analysis. Cell color corresponds to fluorescent dye as follows: blue = 6-FAM, yellow = NED, green = VIC. Estimated sizes of the fragments corresponding to each marker are listed.
