# Supplementary material
Source: PubMed Central journal article supplement (PMC5892395)
Supplement: esx066_suppl_supplement_table3.pdf [file esx066_suppl_supplement_table3.pdf]

| Haplotype | VVY3 | VVY5a | VVY5b | VVY7 | VVY8 | VVY10a | VVY10b | VVY10c | VVY11 | VVY13 | VVY14 | VVY15 | VVY16 | VVY17 | Y29 | Y30 |
|-----------|------|-------|-------|------|------|--------|--------|--------|-------|-------|-------|-------|-------|-------|-----|-----|
| A1        | 417  | ?     | 228   | 269  | 118  | ?      | 304    | ?      | 300   | 426   | 154   | 174   | 237   | 241   | 189 | 423 |
| A2        | ?    | ?     | 228   | 269  | 118  | ?      | ?      | ?      | ?     | 426   | 154   | ?     | 237   | 241   | 189 | 421 |
| Alopex    | ?    | 216   | ?     | 256  | 121  | 308    | 310    | 312    | ?     | 431   | 154   | 175   | 226   | 267   | 179 | 411 |
| B         | 417  | ?     | 230   | 273  | 118  | ?      | 302    | 304    | 300   | 426   | 154   | 174   | ?     | 241   | 189 | 423 |
| C         | 417  | ?     | 230   | 273  | 118  | ?      | 304    | ?      | 300   | 426   | 154   | 174   | 243   | 241   | 189 | 415 |
| D         | 417  | ?     | 228   | 273  | 118  | ?      | 304    | ?      | 304   | 426   | 154   | 174   | 241   | 241   | 189 | 421 |
| E         | ?    | ?     | ?     | ?    | ?    | ?      | ?      | ?      | ?     | ?     | ?     | 174   | ?     | 241   | 189 | 425 |
| F         | ?    | 224   | ?     | ?    | 118  | ?      | ?      | ?      | 304   | 426   | 150   | 174   | ?     | 241   | 189 | 415 |
| G         | 413  | 222   | ?     | 269  | 118  | 298    | 304    | 306    | 304   | 426   | 150   | 171   | 233   | ?     | 189 | 415 |
| H         | ?    | 218   | 226   | ?    | 118  | ?      | ?      | ?      | 304   | 426   | 150   | 171   | 235   | 241   | 189 | 415 |
| I         | 423  | 222   | 226   | 262  | 121  | 300    | 304    | 310    | 312   | 418   | 150   | 182   | 218   | 253   | 191 | 405 |
| J         | 419  | 226   | 230   | 262  | 121  | 300    | 304    | 312    | 312   | 418   | 150   | 182   | 218   | 253   | 191 | 405 |
| K         | ?    | 224   | 230   | 262  | 121  | 300    | 304    | 312    | ?     | 418   | ?     | 184   | 218   | 255   | 191 | 399 |
| L         | 423  | 218   | 226   | 282  | 121  | 300    | 302    | 308    | 316   | 418   | 150   | 171   | 215   | 253   | 189 | 405 |
| M         | 423  | 220   | 230   | 266  | 121  | 300    | 304    | 312    | 312   | 418   | 150   | 182   | 220   | 253   | 191 | 405 |
| N1        | 423  | 220   | 230   | 266  | 121  | 300    | 304    | 312    | 308   | 418   | 150   | 182   | 220   | 253   | 191 | 405 |
| N2        | 428  | 220   | 230   | 266  | 121  | 300    | 304    | 312    | 308   | 418   | 150   | 182   | 220   | 253   | 191 | 405 |
| N3        | 428  | ?     | 230   | 266  | 121  | 300    | ?      | 312    | 308   | 418   | 150   | 182   | 220   | 253   | 191 | 405 |
| O         | 428  | 220   | 228   | 270  | 121  | 300    | 304    | 312    | 308   | 418   | 150   | 182   | 220   | 253   | 191 | 405 |
| P         | ?    | 224   | 232   | 274  | 121  | 300    | 302    | 312    | 308   | 418   | 150   | 184   | 213   | 253   | 189 | 405 |
| Q         | 438  | 222   | 226   | 258  | 121  | 300    | 302    | 310    | 312   | 418   | 150   | 180   | 215   | 253   | 193 | 405 |
| R         | 428  | 222   | 226   | 258  | 121  | 300    | 302    | 314    | 312   | 418   | 150   | 188   | 215   | 253   | 193 | 405 |
| S         | 433  | 222   | 226   | 262  | 121  | 300    | 306    | 312    | 312   | 418   | 150   | 182   | 218   | 253   | 195 | 405 |

**Supplementary Table 3: Genotype calls associated with each of the 22 red fox haplotypes and outgroup (Arctic fox) haplotype.** VVY10 does not include the M13 tag, but all other loci do (corresponding to an additional 18 bp). Because multiple alleles can be found within a single individual at VVY5 and VVY10, these marker calls are split in multiple columns according to the scoring scheme described in the Supplemental Note. Boxed cells are calibrated to match Statham et al. (2014); grey, boxed cells are genotype calls conducted by Statham et al. (2014) and included in the present analysis.
