# Supplementary material
Source: PubMed Central journal article supplement (PMC5892395)
Supplement: esx066_suppl_supplement_table4.pdf [file esx066_suppl_supplement_table4.pdf]

| Y29/Y30 Haplotype | Great Britain | Maryland | Newfoundland | Farm | Full-Panel Haplotypes  | Previous Reports                            |
|-------------------|---------------|----------|--------------|------|------------------------|---------------------------------------------|
| 172/407           | 1*            |          |              |      | E                      | Statham et al. 2014                         |
| 172/403           | 1             | 1        |              |      | B, A1                  | -                                           |
| 172/401           | 2*            |          |              |      | A2, D                  | Statham et al. 2014                         |
| 172/397           | 5*            |          |              |      | C, F, G, H             | Statham et al. 2014; Kasproicz et al., 2016 |
| 172/387           |               |          | 1            | 11   | P, L                   | Statham et al. 2014; Kasproicz et al., 2016 |
| 174/387           |               | 10       |              | 37   | O, N1, N2, N3, M, I, J | Statham et al. 2014; Kasproicz et al., 2016 |
| 176/387           |               |          | 5            |      | Q, R                   | Statham et al. 2014; Kasproicz et al., 2016 |
| 174/381           |               |          | 1            |      | K                      | -                                           |
| 178/387           |               | 1        |              |      | S                      | Kasproicz et al., 2016                      |

**Supplementary Table 4: Summary of haplotypes called using only the previously available markers.** The length of the M13 tag is removed to allow for comparison to Statham et al. (2014). Asterisks indicate populations where some calls were supplemented with data from the genotyping done by Statham et al. (2014). Haplotypes are marked as previously reported if they appear in Statham et al. (2014) or Kasproicz et al. (2016).
