# Supplementary material
Source: PubMed Central journal article supplement (PMC5892395)
Supplement: esx066_suppl_supplement_table5.pdf [file esx066_suppl_supplement_table5.pdf]

| Population    | Number of<br>Individuals Sampled | Observed Number<br>of Haplotypes |                   | Effective Number of<br>Haplotypes |                   | Haplotype Richness |                   |
|---------------|----------------------------------|----------------------------------|-------------------|-----------------------------------|-------------------|--------------------|-------------------|
|               |                                  | <i>Y29/Y30</i>                   | <i>Full Panel</i> | <i>Y29/Y30</i>                    | <i>Full Panel</i> | <i>Y29/Y30</i>     | <i>Full Panel</i> |
| <i>Panel:</i> | <i>Combined</i>                  |                                  |                   |                                   |                   |                    |                   |
| Great Britain | 9                                | 4                                | 7                 | 2.6                               | 6.2               | 3.5                | 5.8               |
| Maryland      | 12                               | 3                                | 6                 | 1.4                               | 4                 | 2.2                | 4.4               |
| Newfoundland  | 7                                | 3                                | 5                 | 1.8                               | 4.5               | N/A (3)            | N/A (5)           |
| Novosibirsk   | 48                               | 2                                | 5                 | 1.5                               | 3.6               | 1.9                | 3.5               |
